# Supplementary material
Source: PubMed Central journal article supplement (PMC8591420)
Supplement: mmc1.pdf [file mmc1.pdf]

**iScience, Volume 24**

**Supplemental information**

**DCcov: Repositioning of drugs  
and drug combinations for SARS-CoV-2  
infected lung through constraint-based modeling**

**Ali Kishk, Maria Pires Pacheco, and Thomas Sauter**

## Supplementary Data

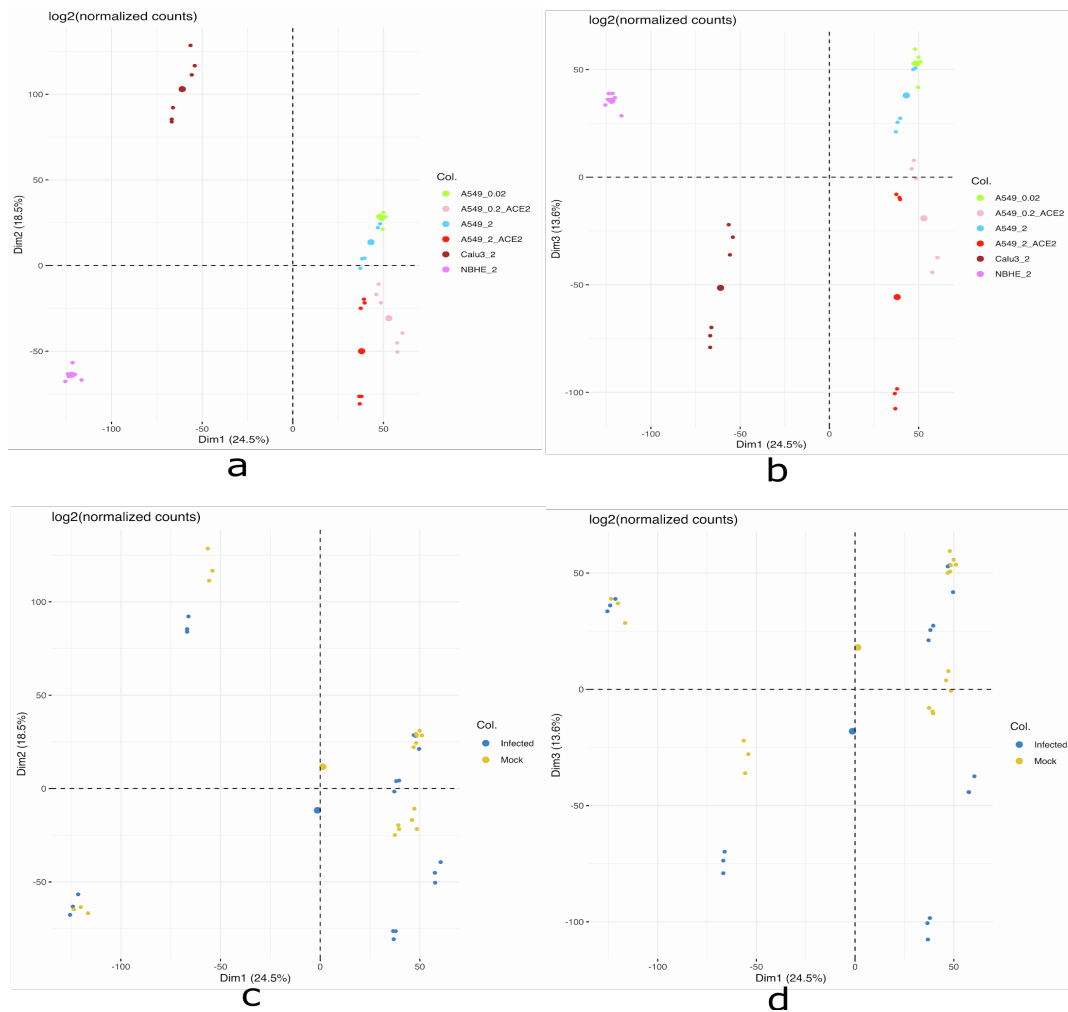

**Figure S1: Principal Component Analysis (PCA) of the Severity Study, given in Log Normalized Read Counts for different principal components (PC), Related to STAR Methods (A.1.2).**

- PC1 vs PC2 colored by cell line and condition.
- PC1 vs PC3 colored by cell line and condition.
- PC1 vs PC2 colored by infection status (infected vs. mock samples).
- PC1 vs PC3 colored by infection status (infected vs mock samples).

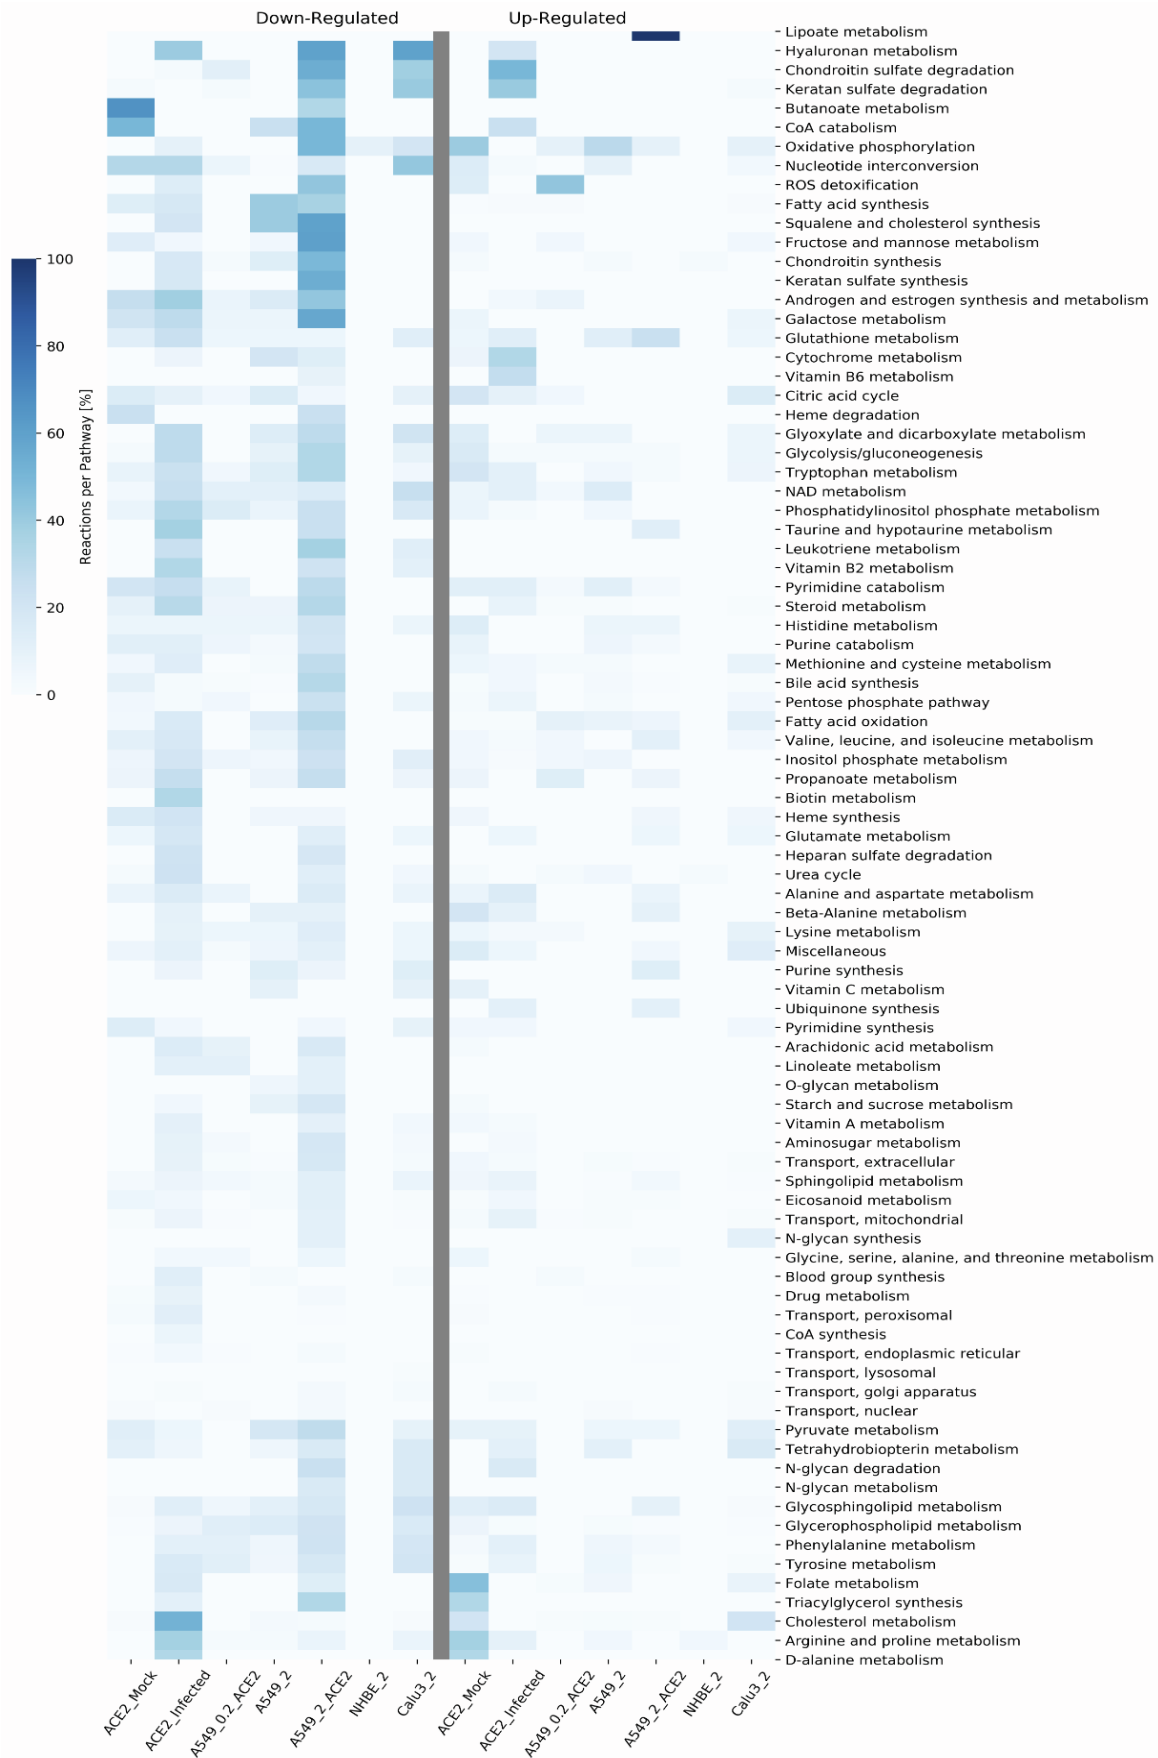

**Figure S2: Reactions per Pathway Heatmap for Pathway Analysis of All Conditions of Differentially expressed genes in the Severity Study, Including the ACE2 Transfection Analyses, Related to Figure 2.**

Differentially expressed genes (DEGs) were computed with DESeq2. The Down- and up-regulated were mapped to the pathways (subSystems) of Recon3D\_01. The number of up and down-regulated reactions was then summed up to identify the top altered pathways in the infected lung cell lines in the severity study (related to STAR Methods A.1.2) but without filters on the number of reactions nor the Reactions per Pathway. The color code "Reactions per Pathway [%]" represents the number of enriched metabolic reactions in a pathway divided by the overall number of reactions in this pathway. Removing filters increased the number of differentially expressed pathways and allowed including the NBHE\_2 condition. Additionally, the figure includes the DEG analysis of the effect of ACE2 transfection in ACE2\_Mock and ACE2\_Infected (related to STAR Methods A.1.2).

Model similarity using Jaccard distance  
based on the Recon3D reconstructed models' reactions

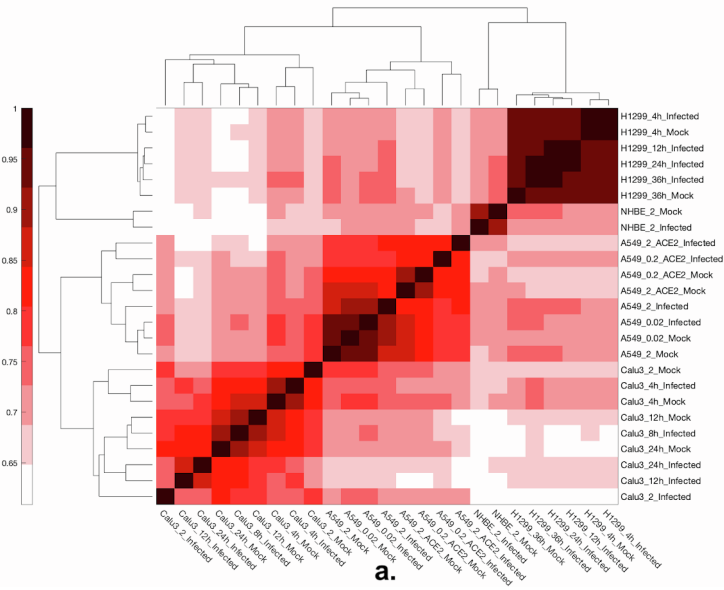

a.

Model similarity using Jaccard distance  
based on the Recon2 reconstructed models' reactions

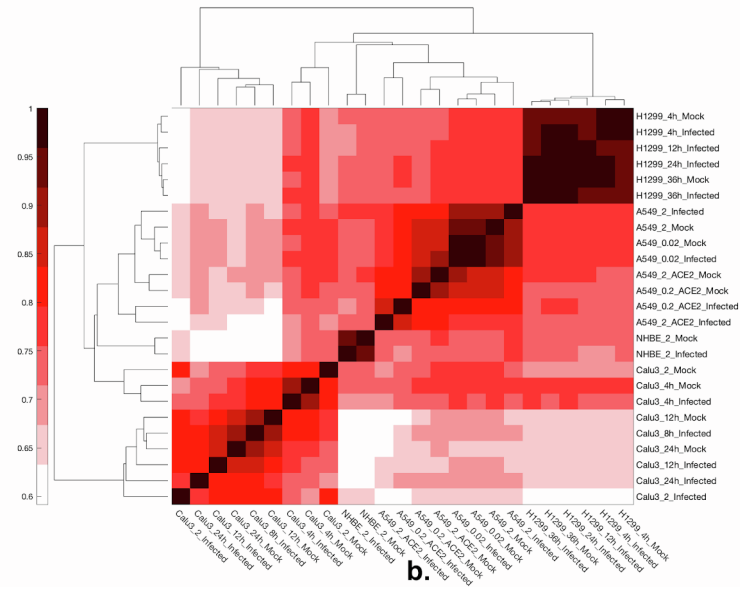

b.

**Figure S3: Clustergrams of the Reconstructed Models' Similarity using Reactions Presence with Jaccard Similarity Metrics of Both Recon3D\_01 Models (a) and Recon2.04 Models (b), Related to Figure 4.**

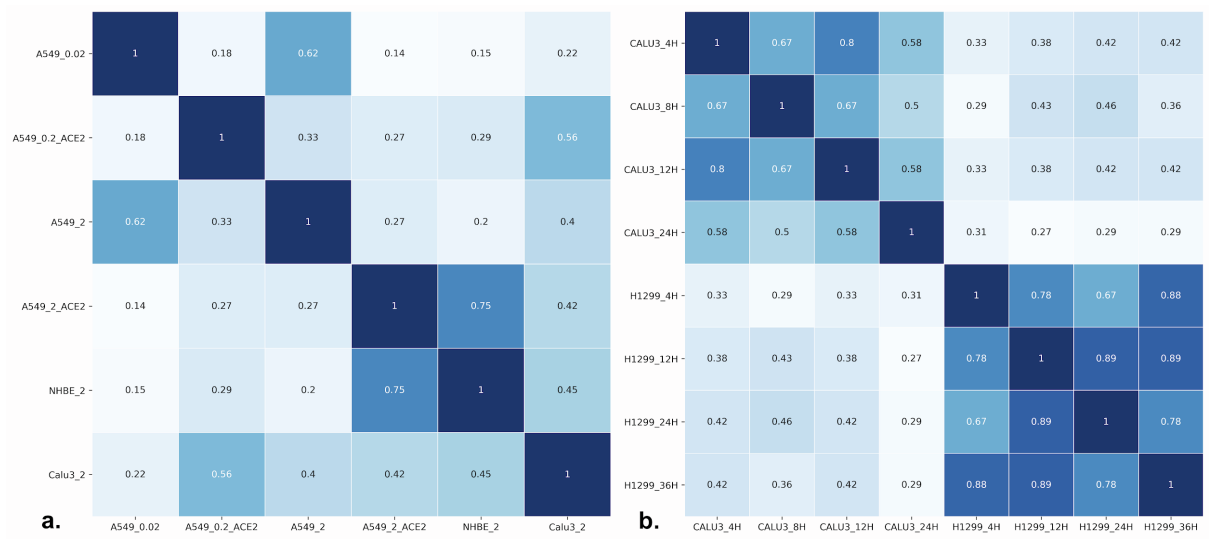

**Figure S4: Jaccard Similarity of the Essential Genes Derived from the Different Conditions of the Two Lung Studies (Severity Study & Time-series Study), Related to STAR Methods (A.2.4).**

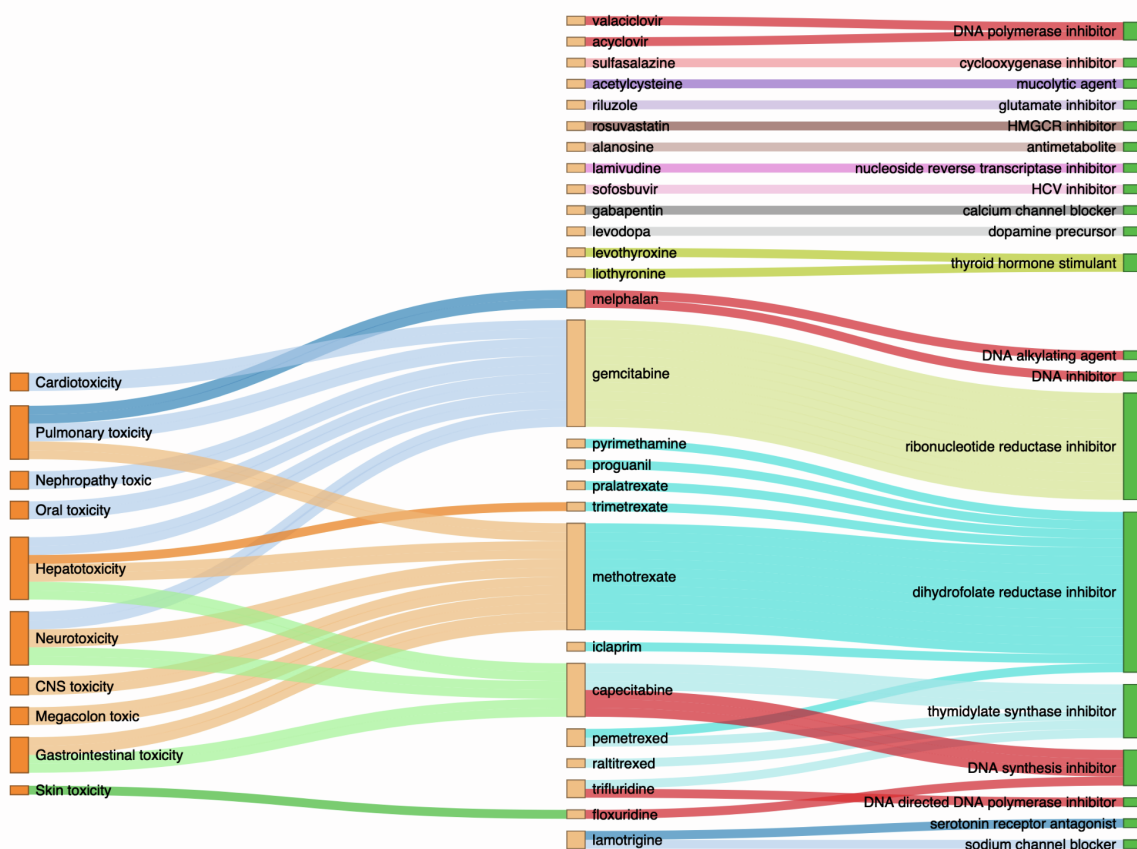

**Figure S5: Tripartite Network of the Candidate Drugs and their Mode of Action and Toxicity, Related to STAR Methods (C).** Drug mode of actions were extracted from the Drug Repurposing Hub database. While the drug toxicity was extracted from the MedDRA database for side effects containing “toxic” words.

**Table S1: Essential Metabolic Genes of the Severity Study, Related to STAR Methods (A.2.4).**

The essential genes of each condition of the infected model are aggregated from the Recon2.04 and Recon3D\_01 based reconstructions. Genes are classified according to the predicted toxicity into toxic or safe, based on the presence or absence from the essential genes of the mock model. A gene is considered with unknown toxicity if there is no mock model corresponding to the infected model, or the essential gene was filtered from the context mock model.

| <b>Condition</b>     | <b>Safe Essential</b>                    | <b>Toxic Essential</b>                                  | <b>Unknown Safety Essential</b> |
|----------------------|------------------------------------------|---------------------------------------------------------|---------------------------------|
| <b>A549_0.02</b>     | SLC3A2; SLC7A11                          | CRLS1; ISYNA1; SGMS1                                    |                                 |
| <b>A549_0.2_ACE2</b> | AGXT; DHFR; SLC27A4; TYMS                | CRLS1; GUK1; PEPD; SGMS1                                |                                 |
| <b>NHBE_2</b>        | SLC3A1; SLC7A9                           | CMPK1; CRLS1; CTH; GUK1; PTDSS1; SGMS1; SLC27A4; SLC5A3 | SLC5A3                          |
| <b>A549_2</b>        | DTYMK; GUK1; PEPD                        | CRLS1; GUK1; ISYNA1; SGMS1; SLC3A2; SLC7A11             |                                 |
| <b>A549_2_ACE2</b>   | CMPK1; CTH; GUK1; PTDSS1; SLC3A1; SLC7A9 | CRLS1; PEPD; SGMS1; SLC2A13                             | SLC5A3                          |
| <b>Calu3_2</b>       | CMPK1; SLC27A4                           | CRLS1; GUK1; PEPD; SGMS1                                |                                 |



**Table S2: Essential Metabolic Genes of the Time-series Study, Related to STAR Methods (A.2.4).**

The essential genes of each condition of the infected model are aggregated from the Recon2.04 and Recon3D based reconstructions. Gene gain and gene loss are genes gained or lost from the previous time point in the same cell line. Time points are in hours. Genes are classified according to the predicted toxicity into toxic or safe, based on the presence or absence from the essential genes of the mock model. A gene is considered with unknown toxicity if there is no mock model corresponding to the infected model, or the essential gene was filtered from the context mock model.

| Condition | Safe Essential                | Toxic Essential                                                          | Unknown Safety Essential                                                       | Gene Gain       | Gene Loss |
|-----------|-------------------------------|--------------------------------------------------------------------------|--------------------------------------------------------------------------------|-----------------|-----------|
| Calu3_4H  | GLTP                          | CRLS1; GUK1; ISYNA1; PEPD;<br>SGMS1; SLC27A4; SLC3A2;<br>SLC7A11         |                                                                                |                 |           |
| Calu3_8H  |                               |                                                                          | CRLS1; GLTP; GUK1; ISYNA1;<br>PEPD; SGMS1; SLC27A4; SLC3A2;<br>SLC7A11; SLC7A5 | SLC7A5          |           |
| Calu3_12H | ISYNA1;<br>SLC27A4;<br>SLC7A5 | CRLS1; GUK1; ISYNA1; PEPD;<br>SGMS1; SLC3A2; SLC7A11;<br>SLC7A5          |                                                                                |                 | GLTP      |
| Calu3_24H | PTDSS1                        | CRLS1; GLTP; GUK1; ISYNA1;<br>SGMS1; SLC27A4; SLC3A2;<br>SLC7A11; SLC7A5 |                                                                                | GLTP;<br>PTDSS1 |           |
| H1299_4H  | CTH                           | CRLS1; ISYNA1; PLD2;<br>SGMS1; SLC27A4; SLC7A6                           |                                                                                |                 |           |
| H1299_12H |                               |                                                                          | CRLS1; CTH; ISYNA1; PEPD;<br>PLD2; SGMS1; SLC27A4; SLC7A6                      | PEPD            |           |
| H1299_24H |                               |                                                                          | CRLS1; ISYNA1; PEPD; PLD2;<br>SGMS1; SLC27A4; SLC7A6                           |                 | CTH       |
| H1299_36H | PEPD; SLC7A6                  | CRLS1; CTH; ISYNA1; PLD2;<br>SGMS1; SLC27A4                              |                                                                                | CTH             |           |

**Table S3: Candidate Drugs for the Essential Genes Given by their Gene Targets, Related to Figure 4.**

Drug-target interactions were downloaded from DrugBank and filtered (related to STAR Methods C). Essential genes were determined using single-gene knockouts. eight essential genes are targeted by 45 drugs.

| Gene Symbol    | Drugs                                                                                                                                                                             | Essentiality Score | Safety Score |
|----------------|-----------------------------------------------------------------------------------------------------------------------------------------------------------------------------------|--------------------|--------------|
| <b>GUK1</b>    | Valaciclovir, Acyclovir                                                                                                                                                           | 16                 | 3            |
| <b>ISYNA1</b>  | Glycerin                                                                                                                                                                          | 9                  | 1            |
| <b>SLC7A11</b> | Riluzole, Taurocholic acid, Alanosine, Thimerosal, Tauroursodeoxycholic acid, Rosuvastatin, Acetylcysteine, Sulfasalazine                                                         | 5                  | 1            |
| <b>CMPK1</b>   | Lamivudine, Gemcitabine, Sofosbuvir                                                                                                                                               | 4                  | 3            |
| <b>SLC7A5</b>  | Dextrothyroxine, Pregabalin, Levothyroxine, Liothyronine, Melphalan, Gabapentin, Levodopa, Thyroid, porcine                                                                       | 3                  | 1            |
| <b>GLTP</b>    | Oleic Acid, Lactose, Lauric acid                                                                                                                                                  | 2                  | 1            |
| <b>DHFR</b>    | Methotrexate, Pyrimethamine, Pemetrexed, Lamotrigine, Piritrexim, Pralatrexate, Trimetrexate, Proguanil, Iclaprim, Gentamicin                                                     | 1                  | 1            |
| <b>TYMS</b>    | ANX-510, Fluorouracil, Capecitabine, Methotrexate, Floxuridine, Thymectacin, Trifluridine, Gemcitabine, Pemetrexed, Pralatrexate, OSI-7904L, Tegafur, Tegafur-uracil, Raltitrexed | 1                  | 1            |

**Table S4: Single Drugs with Two Paired Targets of Double Gene Deletion, Related to Figure 5.B.**

Candidate gene-pairs with possible essentiality to the viral biomass were determined by double gene knockout (related to STAR Methods A.2.3). Gene-pairs that have one drug for both gene targets were selected. Essentiality and safety scores were calculated (related to STAR Methods A.2.4). As many gene-pairs share the same drug, gene-pairs were clustered by their drugs. Essentiality and safety scores were averaged between the different gene-pairs. Drugs were sorted by the number of gene-pairs they are targeting.

| Drug                | Gene Pairs                                   | Average Essentiality Score | Average Safety Score | Number of Gene Pairs |
|---------------------|----------------------------------------------|----------------------------|----------------------|----------------------|
| Gemcitabine         | CMPK1;SLC29A2, TYMS;SLC29A2, SLC29A2;SLC29A1 | 1.66                       | 1                    | 3                    |
| Trifluridine        | TYMS;TYMP, TYMS;SLC29A2, SLC29A2;SLC29A1     | 1.33                       | 1                    | 3                    |
| Mercaptopurine      | PPAT;HPRT1, SLC29A2;SLC29A1                  | 3.5                        | 1                    | 2                    |
| Tegafur-uracil      | TYMS;SLC29A2, SLC29A2;SLC29A1                | 1.5                        | 1                    | 2                    |
| Valaciclovir        | SLC15A2;SLC15A1                              | 13                         | 0                    | 1                    |
| Moexipril           | SLC15A2;SLC15A1                              | 13                         | 0                    | 1                    |
| Nateglinide         | SLC15A2;SLC15A1                              | 13                         | 0                    | 1                    |
| Oxacillin           | SLC15A2;SLC15A1                              | 13                         | 0                    | 1                    |
| Perindopril         | SLC15A2;SLC15A1                              | 13                         | 0                    | 1                    |
| Lisinopril          | SLC15A2;SLC15A1                              | 13                         | 0                    | 1                    |
| Valganciclovir      | SLC15A2;SLC15A1                              | 13                         | 0                    | 1                    |
| Spirapril           | SLC15A2;SLC15A1                              | 13                         | 0                    | 1                    |
| Tolbutamide         | SLC15A2;SLC15A1                              | 13                         | 0                    | 1                    |
| Trandolapril        | SLC15A2;SLC15A1                              | 13                         | 0                    | 1                    |
| Ubenimex            | SLC15A2;SLC15A1                              | 13                         | 0                    | 1                    |
| Ramipril            | SLC15A2;SLC15A1                              | 13                         | 0                    | 1                    |
| Quinapril           | SLC15A2;SLC15A1                              | 13                         | 0                    | 1                    |
| Cefepime            | SLC15A2;SLC15A1                              | 13                         | 0                    | 1                    |
| Cefixime            | SLC15A2;SLC15A1                              | 13                         | 0                    | 1                    |
| Cefalotin           | SLC15A2;SLC15A1                              | 13                         | 0                    | 1                    |
| Cefdinir            | SLC15A2;SLC15A1                              | 13                         | 0                    | 1                    |
| Ceftazidime         | SLC15A2;SLC15A1                              | 13                         | 0                    | 1                    |
| Ceftriaxone         | SLC15A2;SLC15A1                              | 13                         | 0                    | 1                    |
| Ceftibuten          | SLC15A2;SLC15A1                              | 13                         | 0                    | 1                    |
| Cefmetazole         | SLC15A2;SLC15A1                              | 13                         | 0                    | 1                    |
| Cefradine           | SLC15A2;SLC15A1                              | 13                         | 0                    | 1                    |
| Cefotaxime          | SLC15A2;SLC15A1                              | 13                         | 0                    | 1                    |
| Amoxicillin         | SLC15A2;SLC15A1                              | 13                         | 0                    | 1                    |
| Aminolevulinic acid | SLC15A2;SLC15A1                              | 13                         | 0                    | 1                    |
| Cefaclor            | SLC15A2;SLC15A1                              | 13                         | 0                    | 1                    |
| Benzylpenicillin    | SLC15A2;SLC15A1                              | 13                         | 0                    | 1                    |

|                |                 |    |   |   |
|----------------|-----------------|----|---|---|
| Ampicillin     | SLC15A2;SLC15A1 | 13 | 0 | 1 |
| Benazepril     | SLC15A2;SLC15A1 | 13 | 0 | 1 |
| Fosinopril     | SLC15A2;SLC15A1 | 13 | 0 | 1 |
| Glyburide      | SLC15A2;SLC15A1 | 13 | 0 | 1 |
| Chlorpropamide | SLC15A2;SLC15A1 | 13 | 0 | 1 |
| Cilazapril     | SLC15A2;SLC15A1 | 13 | 0 | 1 |
| Cephalexin     | SLC15A2;SLC15A1 | 13 | 0 | 1 |
| Cefuroxime     | SLC15A2;SLC15A1 | 13 | 0 | 1 |
| Dicloxacillin  | SLC15A2;SLC15A1 | 13 | 0 | 1 |
| Cloxacillin    | SLC15A2;SLC15A1 | 13 | 0 | 1 |
| Cyclacillin    | SLC15A2;SLC15A1 | 13 | 0 | 1 |
| Zalcitabine    | SLC29A2;SLC29A1 | 2  | 2 | 1 |
| Didanosine     | SLC29A2;SLC29A1 | 2  | 2 | 1 |
| Capecitabine   | TYMS;TYMP       | 1  | 1 | 1 |
| Fluorouracil   | TYMS;TYMP       | 1  | 1 | 1 |
| Floxuridine    | TYMS;TYMP       | 1  | 1 | 1 |

**Table S5: Reduced list of Double Gene Deletion Drug Pairs, Related to Figure 5.A.**

Candidate gene-pairs with possible essentiality to the viral biomass were determined by double gene knockout (DKO) (related to STAR Methods A.2.3). Gene-pairs that have one drug for both genes were excluded. Essentiality and safety scores and the number of gene-pairs were calculated such as in (Table S4). The reduced DKO drug dataset was filtered by selecting drug pairs with more than two in essentiality scores, and more than one in either the number of gene-pairs or safety scores.

| Drugs1           | Drugs2         | Gene Pair                                                           | Average Essentiality Score | Average Safety Score | Number of Gene Pairs |
|------------------|----------------|---------------------------------------------------------------------|----------------------------|----------------------|----------------------|
| Azathioprine     | Pemetrexed     | HPRT1;GART, SLC29A2;SLC29A1, TYMS;SLC29A2, DHFR;SLC29A2, ATIC;HPRT1 | 2.8                        | 0.4                  | 5                    |
| Mercaptopurine   | Pemetrexed     | HPRT1;GART, SLC29A2;SLC29A1, TYMS;SLC29A2, DHFR;SLC29A2, ATIC;HPRT1 | 2.8                        | 0.4                  | 5                    |
| Cladribine       | Valaciclovir   | GUK1;PNP, RRM2;GUK1, RRM1;GUK1                                      | 9.33                       | 0                    | 3                    |
| Cladribine       | Acyclovir      | GUK1;PNP, RRM2;GUK1, RRM1;GUK1                                      | 9.33                       | 0                    | 3                    |
| Cefradine        | Methotrexate   | SLC22A5;DHFR, SLC22A5;TYMS, SLC15A2;SLC15A1                         | 5                          | 0.66                 | 3                    |
| Benzylpenicillin | Methotrexate   | SLC22A5;DHFR, SLC22A5;TYMS, SLC15A2;SLC15A1                         | 5                          | 0.66                 | 3                    |
| Cefalotin        | Methotrexate   | SLC22A5;DHFR, SLC22A5;TYMS, SLC15A2;SLC15A1                         | 5                          | 0.66                 | 3                    |
| Ampicillin       | Methotrexate   | SLC22A5;DHFR, SLC22A5;TYMS, SLC15A2;SLC15A1                         | 5                          | 0.66                 | 3                    |
| Ceftazidime      | Methotrexate   | SLC22A5;DHFR, SLC22A5;TYMS, SLC15A2;SLC15A1                         | 5                          | 0.66                 | 3                    |
| Cefdinir         | Methotrexate   | SLC22A5;DHFR, SLC22A5;TYMS, SLC15A2;SLC15A1                         | 5                          | 0.66                 | 3                    |
| Cefepime         | Methotrexate   | SLC22A5;DHFR, SLC22A5;TYMS, SLC15A2;SLC15A1                         | 5                          | 0.66                 | 3                    |
| Cefixime         | Methotrexate   | SLC22A5;DHFR, SLC22A5;TYMS, SLC15A2;SLC15A1                         | 5                          | 0.66                 | 3                    |
| Cyclacillin      | Methotrexate   | SLC22A5;DHFR, SLC22A5;TYMS, SLC15A2;SLC15A1                         | 5                          | 0.66                 | 3                    |
| Cephalexin       | Methotrexate   | SLC22A5;DHFR, SLC22A5;TYMS, SLC15A2;SLC15A1                         | 5                          | 0.66                 | 3                    |
| Azathioprine     | Fluorouracil   | TYMS;SLC29A2, PPAT;HPRT1, SLC29A2;SLC29A1                           | 2.66                       | 0.66                 | 3                    |
| Mercaptopurine   | Fluorouracil   | TYMS;SLC29A2, PPAT;HPRT1, SLC29A2;SLC29A1                           | 2.66                       | 0.66                 | 3                    |
| Methotrexate     | Azathioprine   | TYMS;SLC29A2, DHFR;SLC29A2, ATIC;HPRT1                              | 2.33                       | 0                    | 3                    |
| Methotrexate     | Mercaptopurine | TYMS;SLC29A2, DHFR;SLC29A2, ATIC;HPRT1                              | 2.33                       | 0                    | 3                    |
| Imexon           | Valaciclovir   | RRM2;GUK1, RRM1;GUK1                                                | 10                         | 0                    | 2                    |
| Imexon           | Acyclovir      | RRM2;GUK1, RRM1;GUK1                                                | 10                         | 0                    | 2                    |
| Tioguanine       | Pemetrexed     | HPRT1;GART, ATIC;HPRT1                                              | 5                          | 0                    | 2                    |
| DB01632          | Pemetrexed     | HPRT1;GART, ATIC;HPRT1                                              | 5                          | 0                    | 2                    |
| Azathioprine     | Mercaptopurine | PPAT;HPRT1, SLC29A2;SLC29A1                                         | 3.5                        | 1                    | 2                    |
| Mercaptopurine   | Mercaptopurine | PPAT;HPRT1, SLC29A2;SLC29A1                                         | 3.5                        | 1                    | 2                    |

|                           |                     |                              |     |   |   |
|---------------------------|---------------------|------------------------------|-----|---|---|
| Human calcitonin          | Cystine             | ANPEP;SLC3A1, ANPEP;SLC7A9   | 3   | 1 | 2 |
| Lamivudine                | Choline salicylate  | CMPK1;SLC22A5, CMPK1;PLD2    | 3   | 1 | 2 |
| Lamivudine                | Choline             | CMPK1;SLC22A5, CMPK1;PLD2    | 3   | 1 | 2 |
| Icatibant                 | Cystine             | ANPEP;SLC3A1, ANPEP;SLC7A9   | 3   | 1 | 2 |
| Gemcitabine               | Choline salicylate  | CMPK1;SLC22A5, CMPK1;PLD2    | 3   | 1 | 2 |
| Gemcitabine               | Choline             | CMPK1;SLC22A5, CMPK1;PLD2    | 3   | 1 | 2 |
| Ezetimibe                 | Cystine             | ANPEP;SLC3A1, ANPEP;SLC7A9   | 3   | 1 | 2 |
| Sofosbuvir                | Choline             | CMPK1;SLC22A5, CMPK1;PLD2    | 3   | 1 | 2 |
| Sofosbuvir                | Choline salicylate  | CMPK1;SLC22A5, CMPK1;PLD2    | 3   | 1 | 2 |
| Gemcitabine               | Phosphatidyl serine | SLC29A2;PTDSS1, CMPK1;PTDSS1 | 2.5 | 2 | 2 |
| Taurocholic acid          | Phosphatidyl serine | SLC16A1;PTDSS1               | 3   | 3 | 1 |
| Nateglinide               | Phosphatidyl serine | SLC16A1;PTDSS1               | 3   | 3 | 1 |
| Lamivudine                | Phosphatidyl serine | CMPK1;PTDSS1                 | 3   | 2 | 1 |
| Quercetin                 | Phosphatidyl serine | SLC16A1;PTDSS1               | 3   | 3 | 1 |
| Probenecid                | Phosphatidyl serine | SLC16A1;PTDSS1               | 3   | 3 | 1 |
| Aminohippuric acid        | Phosphatidyl serine | SLC16A1;PTDSS1               | 3   | 3 | 1 |
| Acetic acid               | Phosphatidyl serine | SLC16A1;PTDSS1               | 3   | 3 | 1 |
| Lactic acid               | Phosphatidyl serine | SLC16A1;PTDSS1               | 3   | 3 | 1 |
| Benzoic acid              | Phosphatidyl serine | SLC16A1;PTDSS1               | 3   | 3 | 1 |
| Ampicillin                | Phosphatidyl serine | SLC16A1;PTDSS1               | 3   | 3 | 1 |
| Salicylic acid            | Phosphatidyl serine | SLC16A1;PTDSS1               | 3   | 3 | 1 |
| Arbaclofen<br>Placarbil   | Phosphatidyl serine | SLC16A1;PTDSS1               | 3   | 3 | 1 |
| Methotrexate              | Phosphatidyl serine | SLC16A1;PTDSS1               | 3   | 3 | 1 |
| Valproic acid             | Phosphatidyl serine | SLC16A1;PTDSS1               | 3   | 3 | 1 |
| Foscarnet                 | Phosphatidyl serine | SLC16A1;PTDSS1               | 3   | 3 | 1 |
| Sofosbuvir                | Phosphatidyl serine | CMPK1;PTDSS1                 | 3   | 2 | 1 |
| Pravastatin               | Phosphatidyl serine | SLC16A1;PTDSS1               | 3   | 3 | 1 |
| gamma-Hydroxybutyric acid | Phosphatidyl serine | SLC16A1;PTDSS1               | 3   | 3 | 1 |
